# Supplementary material for: Combining QCM-D with live-cell imaging reveals the impact of serum proteins on the dynamics of fibroblast adhesion on tannic acid-functionalised surfaces
Source: Royal Society of Chemistry journal article supplement (doi:10.1039/d4bm00184b), 2024-01-01
Supplement: d4bm00184b1.pdf [file d4bm00184b1.pdf]

**Supplementary information**

# Combining QCM-D with live cell imaging reveals the impact of serum proteins on the dynamics of fibroblast adhesion on tannic acid-functionalised surfaces

*Agnes Rogala<sup>a#</sup>, Daria Zaytseva-Zotova<sup>a#</sup>, Enrique Oreja<sup>a</sup>, Alejandro Barrantes<sup>b</sup>, Hanna Tiainen<sup>a\*</sup>*

<sup>a</sup> – Department of Biomaterials, Institute of Clinical Dentistry, University of Oslo, Norway

<sup>b</sup> – Clinical Oral Research Laboratory, Institute of Clinical Dentistry, University of Oslo, Norway

<sup>#</sup> - A.R. and D.Z. contributed equally to this work

<sup>\*</sup> - Corresponding author

## **Abbreviations**

Human gingival fibroblasts (hGF), fetal bovine serum (FBS), titanium (Ti), tannic acid (TA) coatings formed at pH 7.8 (TA78) and pH 6.8 (TA68),

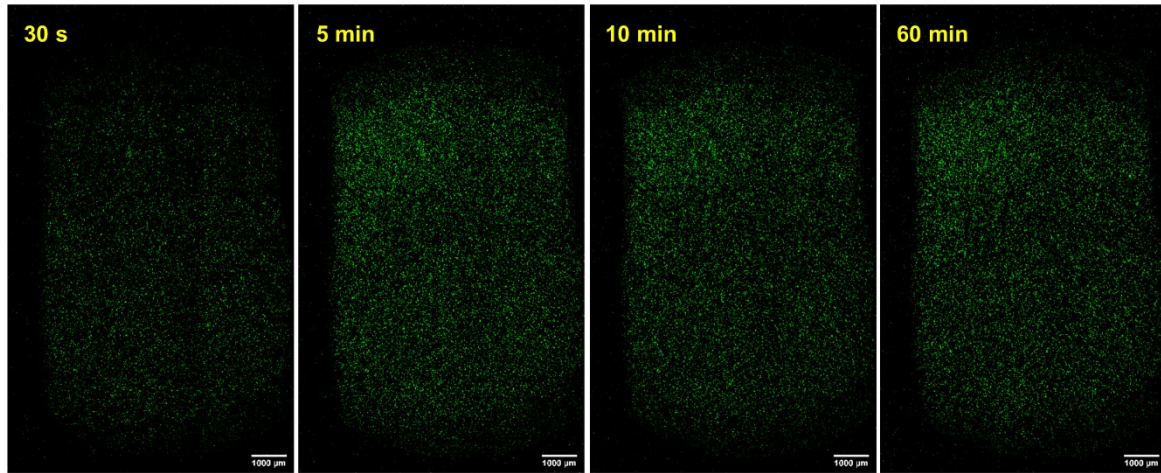

**Figure S1. Cell distribution over the titanium sensor surface after cell injection into the QCM-D chamber.** Cell suspension of  $0.5 \times 10^6$  cells/ml was injected into a QCM module at 300  $\mu\text{l}/\text{min}$  for 30 sec. Cells were labelled with a CellTracker™ Green CMFDA fluorescent dye (green). The tile stacks were acquired with a laser scanning confocal microscope equipped with a 5 $\times$ /0.15 dry HC PL FLUOTAR objective. Scale bar: 1000  $\mu\text{m}$ .

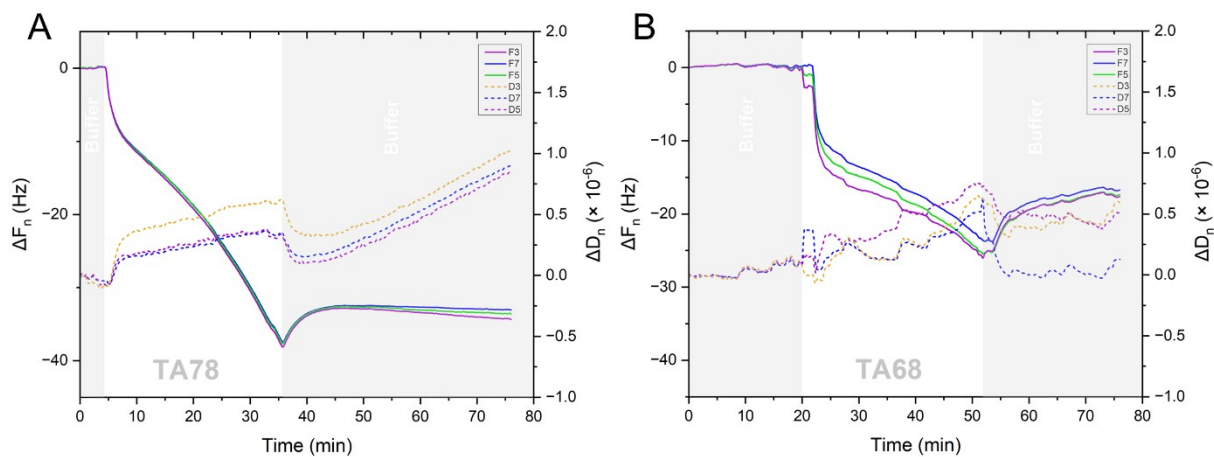

**Figure S2. TA deposition onto titanium surfaces at pH = 7.8 (A) and pH = 6.8 (B). Representative progression of frequency ( $\Delta F$ ) and dissipation ( $\Delta D$ ) shifts of the 3<sup>rd</sup>, 5<sup>th</sup>, 7<sup>th</sup> and 9<sup>th</sup> QCM-D harmonic ( $n$ ) as a function of time. Sections 1, 2, and 3 represent equilibration in a buffer, 30-minute deposition of TA, and washing with a buffer; 100  $\mu\text{l}/\text{min}$  flow rate. The experiment was performed at 37  $^{\circ}\text{C}$ .**

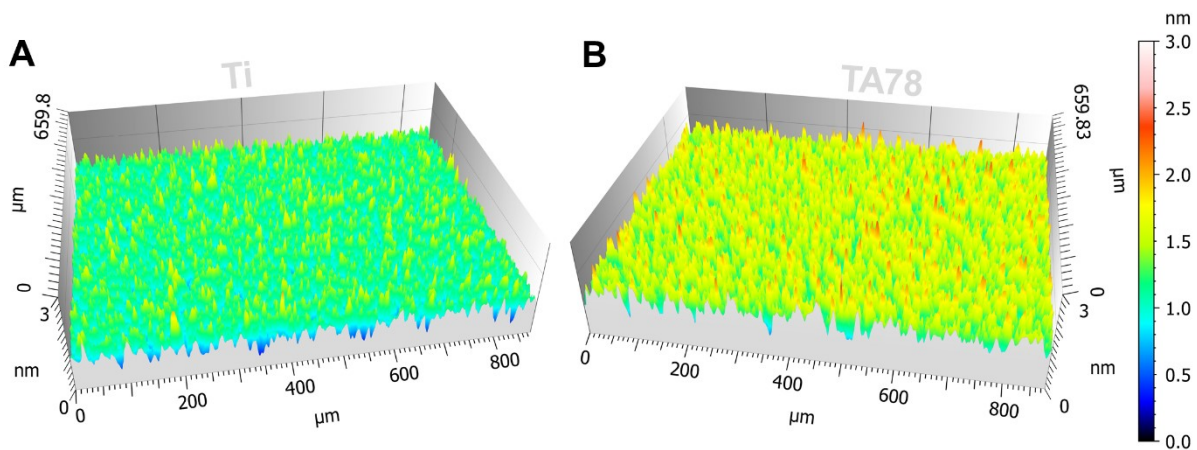

**Figure S3. 3D-profilometry images of uncoated (A) and TA-coated (B) titanium QCM-D sensor crystals.** TA was deposited at a flow rate of 100  $\mu\text{l}/\text{min}$  at 37  $^{\circ}\text{C}$  for 30 minutes, followed by washing with a coating buffer and rinsing with water. The images were captured using a Sensofar S neox optical profilometer equipped with a 20 $\times$  objective in an interferometric scan mode. The average surface roughness ( $S_a$ ) calculated from the profilometry data was  $0.19 \pm 0.01$  nm for Ti and  $0.20 \pm 0.02$  nm for TA78, with measurements taken from two different sensors and five readings per sensor.

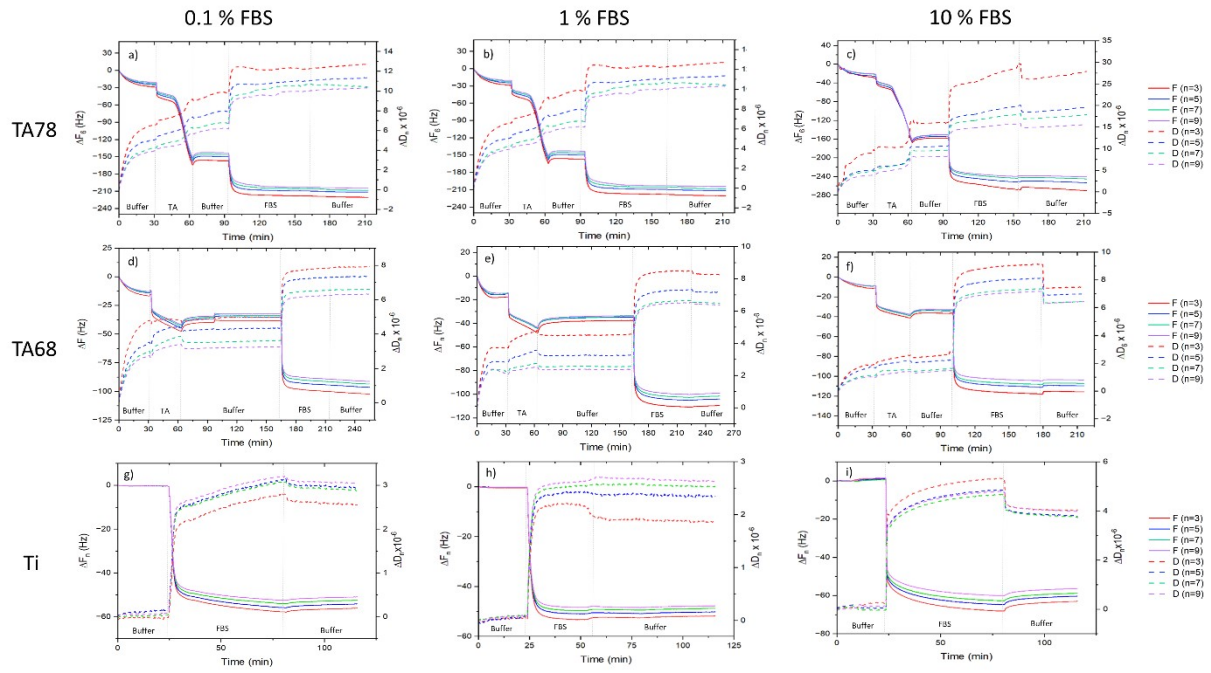

**Figure S4. Adsorption of FBS proteins onto TA nano-coatings and uncoated titanium surface followed by QCM-D.** The QCM-D data are presented as representative normalised frequency and dissipation shifts for 3<sup>rd</sup>, 5<sup>th</sup>, 7<sup>th</sup> and 9<sup>th</sup> harmonics over time. The sensors were pre-coated with 1 mg/ml TA for 30 minutes, 100  $\mu$ l/min. The corresponding FBS solution was deposited for 60 minutes, 100  $\mu$ l/min. In the beginning of the experiment and after each step, a buffer (100 mM HEPES, 600 mM NaCl buffer, pH 6.8 or 7.8) was introduced into the chamber. The experiments were performed at 21  $^{\circ}$ C. The data is divided into three sets: adsorption onto (A-C) TA78 coating, (D-F) TA68 nanocoating and (G-I) uncoated titanium. These sets correspond to different concentrations of FBS: A, D and G correspond to 0.1% FBS; B, E, and H represent 1% FBS; lastly C, F, and I show 10% FBS. The thickness of the TA68 and TA78 layers was  $5.2 \pm 0.1$  nm and  $26.3 \pm 0.4$  nm, respectively (Sauerbrey).

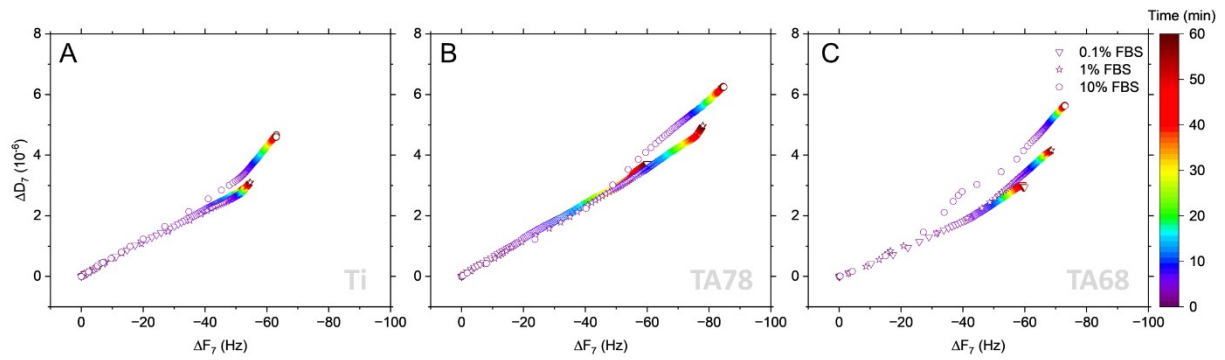

**Figure S5. Average DF plots for 7<sup>th</sup> harmonic of adsorption of FBS proteins onto uncoated titanium (A), tannic acid nanocoatings TA78 (B) and TA68 (C).** The sensors were pre-coated with 1 mg/ml TA for 30 minutes, 100  $\mu$ l/min. The corresponding FBS solution was deposited for 60 minutes, 100  $\mu$ l/min. In the beginning of the experiment and after each step, a buffer (100 mM HEPES, 600 mM NaCl buffer, pH 6.8 or 7.8) was introduced into the chamber. The experiments were performed at 21  $^{\circ}$ C.

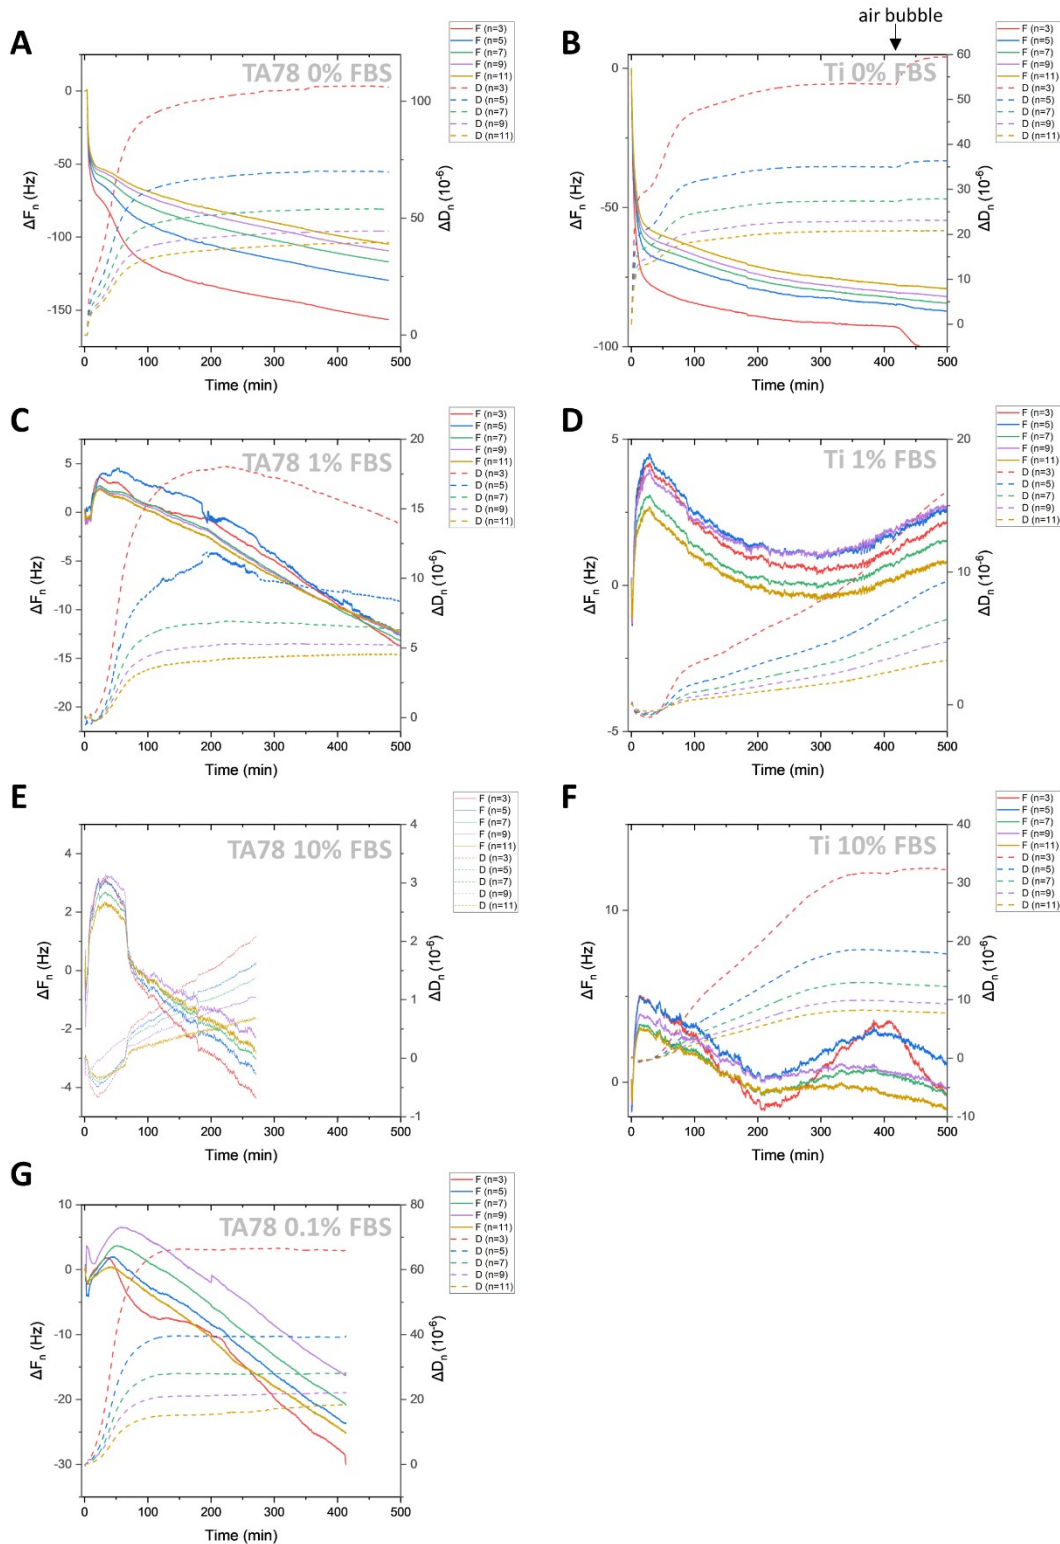

**Figure S6. Representative frequency and dissipation shifts at 3<sup>rd</sup>, 5<sup>th</sup>, 7<sup>th</sup> and 9<sup>th</sup> harmonics (n) as a function of time after hGF injection in medium containing 0-10% FBS. Left panel (A,C,E,G) is TA78 coated titanium surface. Right panel (B,D,F) is uncoated bare titanium surface. Cells were cultured in serum-free medium (A-B) and medium supplemented with 0.1% FBS (G), 1% FBS (C-D), 10% FBS (E-F). Arrow shows an air bubble entering the QCM-D chamber.**



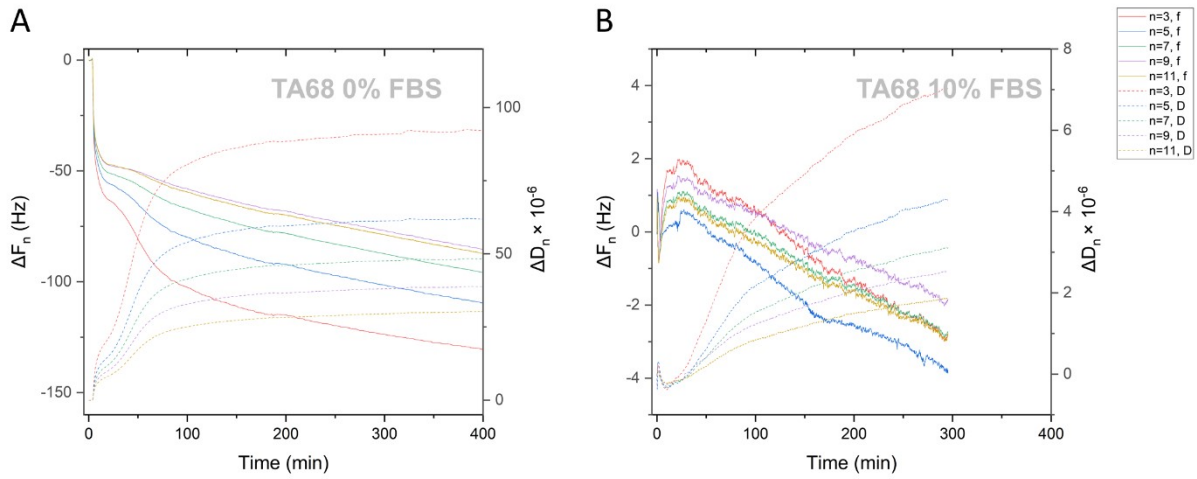

**Figure S7. Representative frequency and dissipation shifts at 3<sup>rd</sup>, 5<sup>th</sup>, 7<sup>th</sup> and 9<sup>th</sup> harmonics (n) on TA68 coatings as a function of time after hGF injection in medium containing (A) 0 %FBS and (B) 10% FBS.**



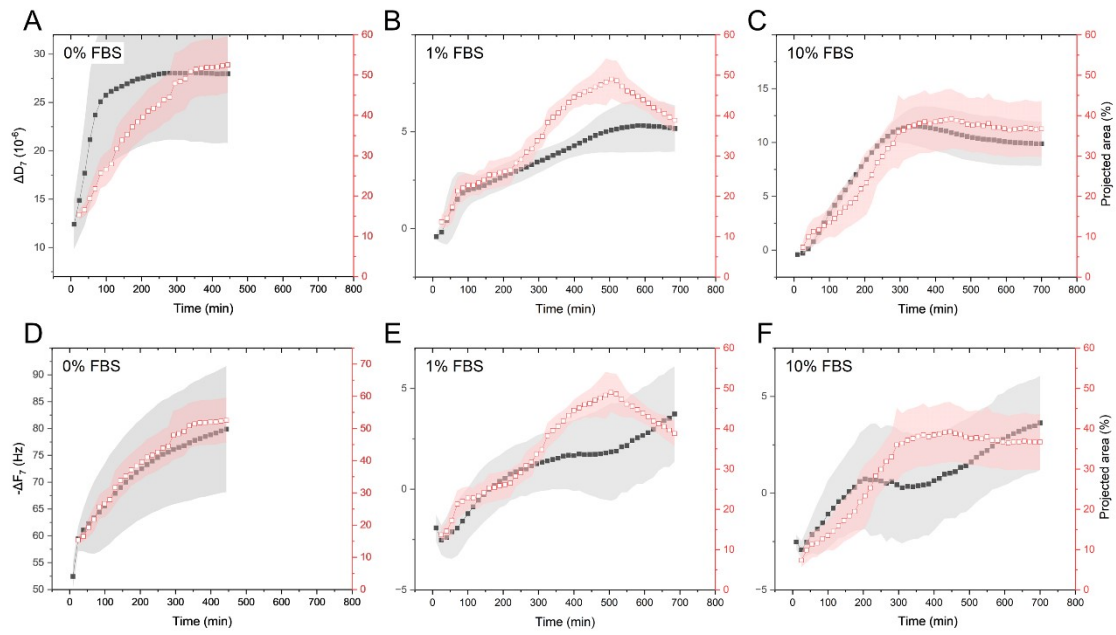

**Figure S8. Relationship between projected cell area and changes in dissipation (A-C) and frequency (D-F) over of time for hGFs cultured on uncoated Ti surfaces in medium containing 0% FBS (A, D), 1% FBS (B, E), or 10% FBS (C, F). Empty red rectangles represent projected cell area. Filled black rectangles represent  $\Delta D$  (A-C) or  $\Delta F$  (D-F). Values are mean  $\pm$  SD.**

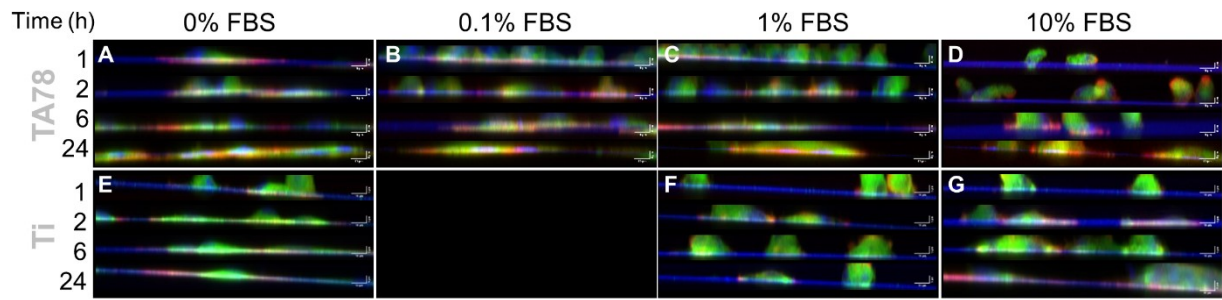

**Figure S9. Representative XY-projections of hGFs cultured on TA78-coated (A-D) and uncoated (E-G) titanium disks in medium containing 0% FBS (A, E), 0.1% FBS (B), 1% FBS (C, F), or 10% FBS (D, G).** Cells were cultured for 1, 2, 6 or 24 hours. The images were acquired with the upright CLSM equipped with 63 $\times$  objective. Typical z-stack had 10 slices with 1  $\mu$ m interval. Immunostaining of F-actin (red), vinculin (green) and nuclear DNA (blue). The blue reflection from the disk surface is an artifact signal. Scale bar: 10  $\mu$ m width and 5  $\mu$ m height.

**Table S1. Slopes of the  $\Delta D/\Delta F$  versus time curves presented in Figure 2B,D.**

| Surface | Slope of the $\Delta D/\Delta F$ versus time curve ( $10^{-11}$ ) |          |             |         |
|---------|-------------------------------------------------------------------|----------|-------------|---------|
|         | 0% FBS                                                            | 0.1% FBS | 1% FBS      | 10% FBS |
| TA78    | 9.78                                                              | 9.87     | 5.65        | 0.37    |
| Ti      | 5.53                                                              | -        | 1.3 / 0.22* | 1.3     |

\* - two phases
